# Supplementary material for: MiR-216b/Smad3/BCL-2 Axis Is Involved in Smoking-Mediated Drug Resistance in Non-Small Cell Lung Cancer
Source: MDPI journal article supplement (doi:10.3390/cancers12071879), 2020-07-13
Supplement: s1 [file s1]

Article

# MiR-216b/Smad3/BCL-2 Axis is Involved in Smoking-mediated Drug resistance in Non-Small Cell Lung Cancer

Trung Vu, Shanzhong Yang and Pran K. Datta

## Supplementary Materials:

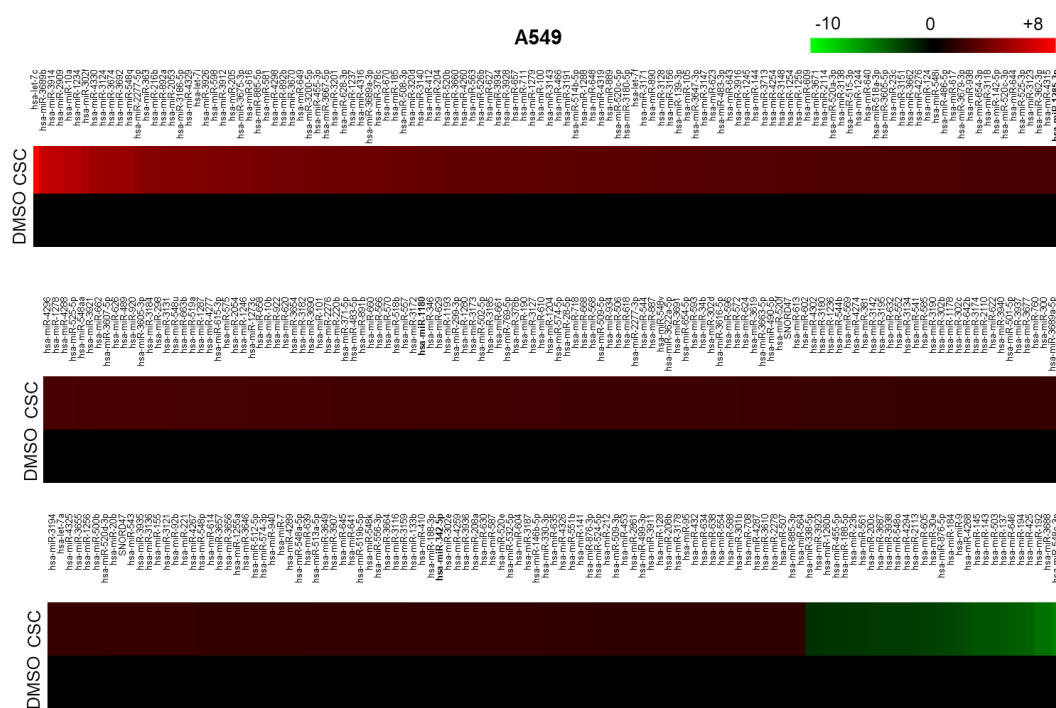

**Figure S1.** Differential upregulation of miRNAs in response to smoking. Heatmaps depicting expression changes of differentially expressed miRNAs (log2 (fold change) > 2 or log2 (fold change) < -2) in A549 cells treated with CSC for 12 months compared to DMSO treated cells. The miRNAs that were previously shown to be associated with smoking status in previous reports were highlighted.

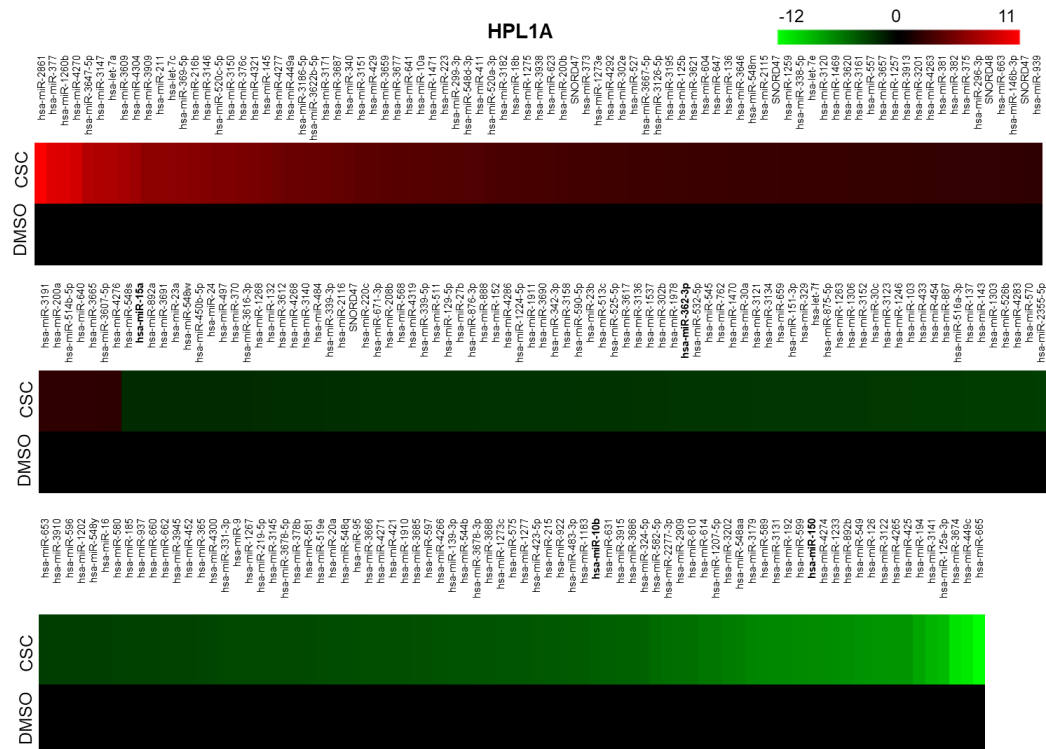

**Figure S2.** Differential downregulation of miRNAs in response to smoking. Heatmaps depicting expression changes of differentially expressed miRNAs ( $\log_2$  (fold change)  $> 2$  or  $\log_2$  (fold change)  $< -2$ ) in HPL1A cells treated with CSC for 12 months compared to DMSO treated cells. The miRNAs that were previously shown to be associated with smoking status in previous reports were highlighted.

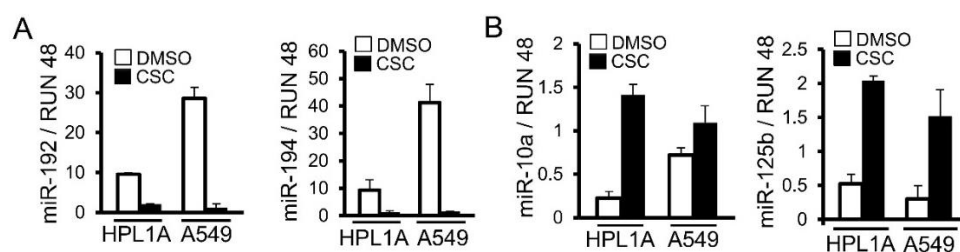

**Figure S3.** Verification of the expression of two up- and down-regulated miRNAs obtained from microarray data. CSC regulates expression of different miRNAs in human lung epithelial cells. qRT-PCR analysis for miR-192, miR-194, miR-10a, and miR-125b expression in A549 and HPL1A cells treated with CSC or DMSO. RUN 48 was used as internal control.

**Figure 2G**

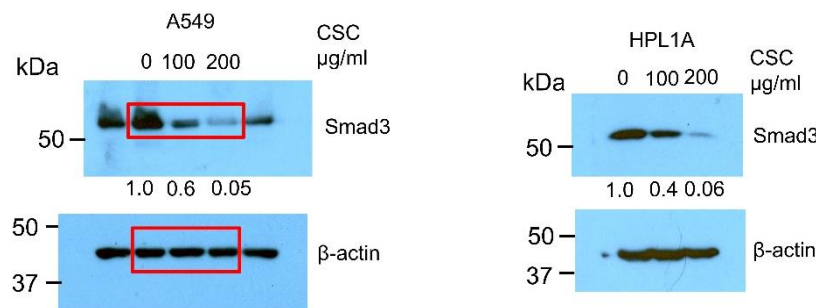

**Figure S4.** Original western blots for Figure 2G showing all bands.

Figure 3C

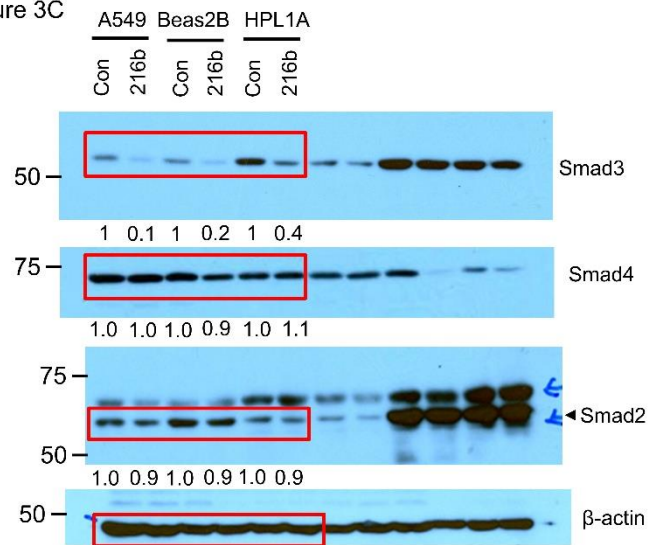

Figure S5. Original western blots for Figure 3C showing all bands.

Figure 5A

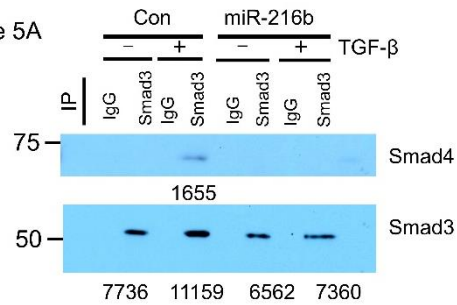

Figure 5E

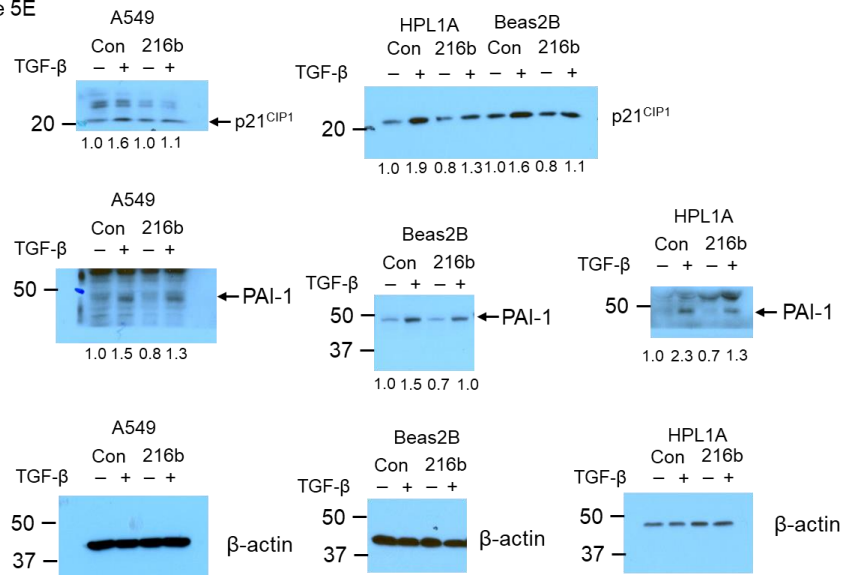

Figure S6. Original western blots for Figure 5 showing all bands.

Figure 6B

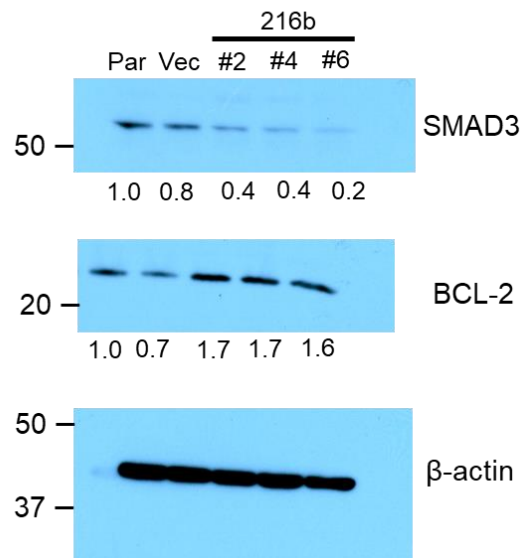

**Figure S7.** Original western blots for Figure 6B showing all bands.

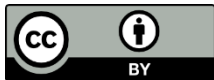

© 2020 by the authors. Submitted for possible open access publication under the terms and conditions of the Creative Commons Attribution (CC BY) license (<http://creativecommons.org/licenses/by/4.0/>).
